# Supplementary material for: Classifications within Molecular Subtypes Enables Identification of BRCA1/BRCA2 Mutation Carriers by RNA Tumor Profiling
Source: PubMed Central journal article supplement (PMC3660328; doi:10.1371/journal.pone.0064268), 2013-05-21
Supplement: pone.0064268.s003.pdf [file pone.0064268.s003.pdf]

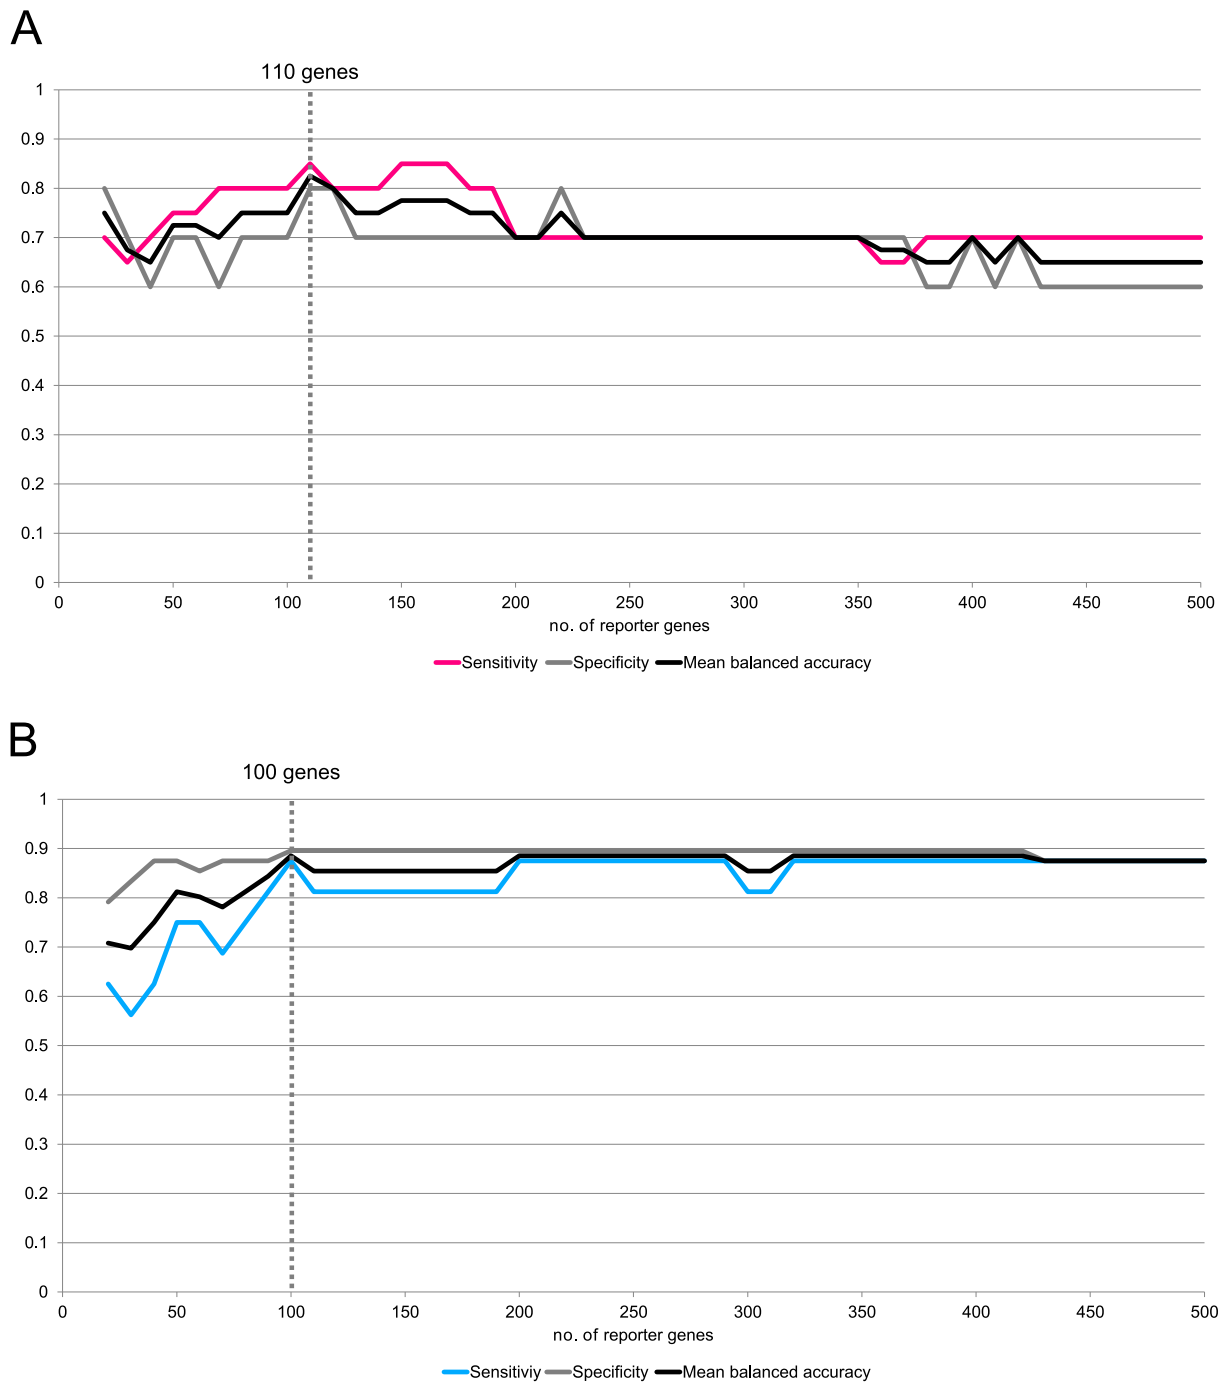

**Figure S2.** Optimization of the number of predictive reporter genes to be included in the basal *BRCA1* signature (A) and lumB *BRCA2* signature (B). For *BRCA1* classification 110 genes were found to be the lowest number of genes providing the highest mean balanced accuracy, while 100 genes were the most optimal for *BRCA2* classification. See Materials and methods section for more details.
