# Supplementary material for: Classifications within Molecular Subtypes Enables Identification of BRCA1/BRCA2 Mutation Carriers by RNA Tumor Profiling
Source: PubMed Central journal article supplement (PMC3660328; doi:10.1371/journal.pone.0064268), 2013-05-21
Supplement: pone.0064268.s004.pdf [file pone.0064268.s004.pdf]

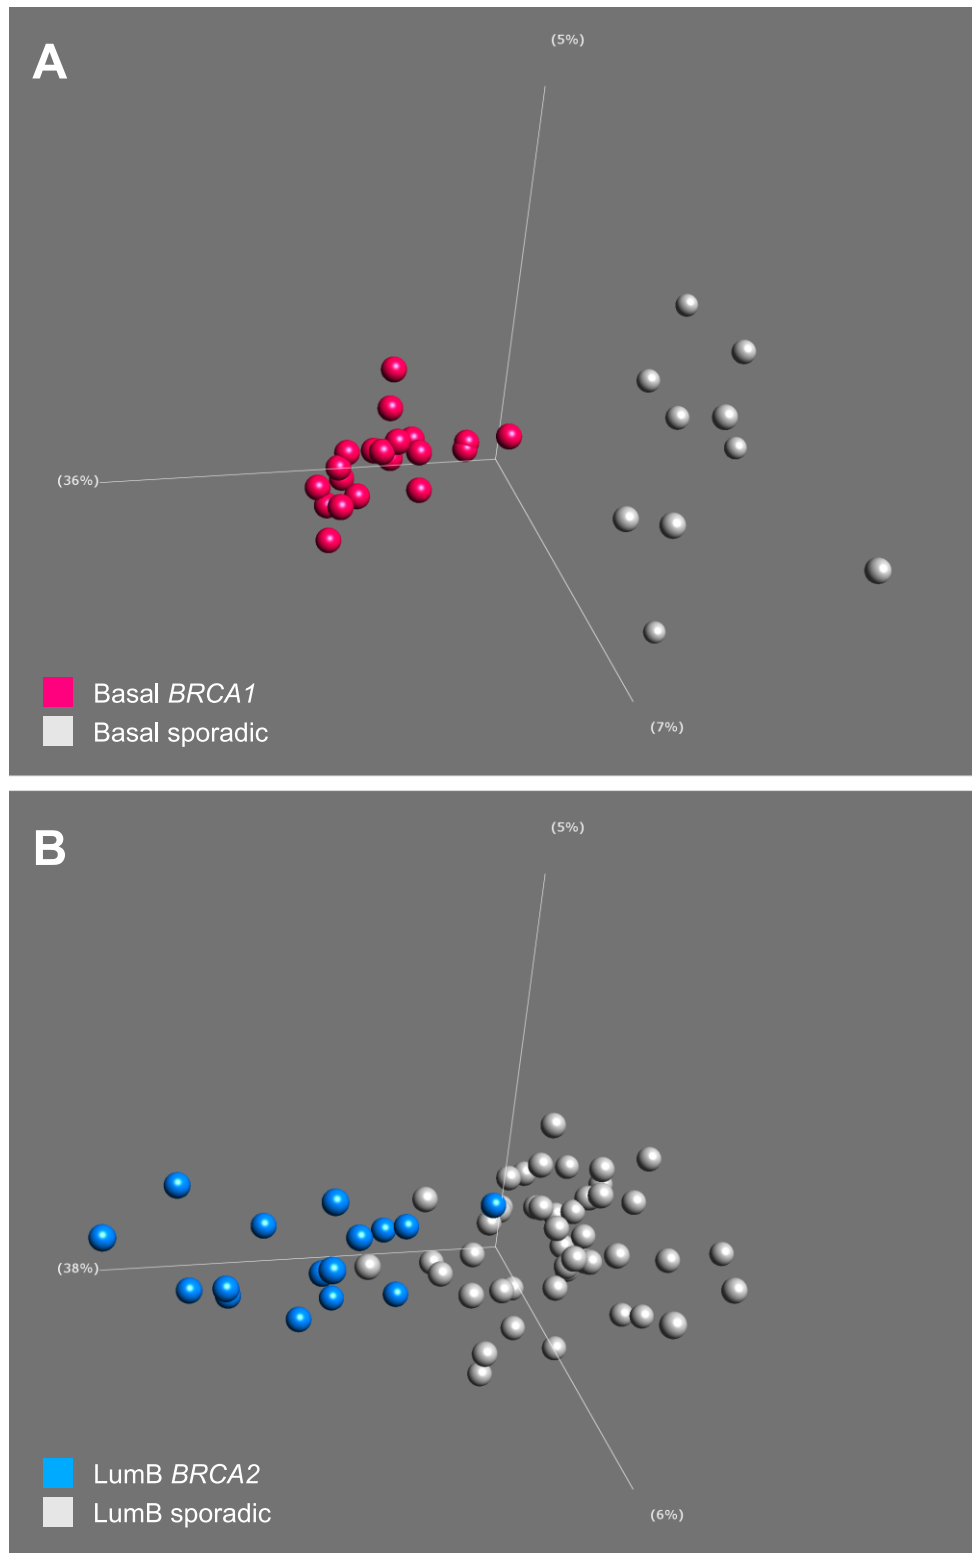

**Figure S3.** PCA plots. A) Basal-like *BRCA1* ( $n = 20$ ) and sporadic ( $n = 10$ ) tumors visualized using the 110 reporter genes included in the basal *BRCA1* signature. B) Luminal B *BRCA2* ( $n = 16$ ) and sporadic ( $n = 48$ ) tumors visualized using the 100 reporter genes included in the *BRCA2* signature.
