# Supplementary material for: Classifications within Molecular Subtypes Enables Identification of BRCA1/BRCA2 Mutation Carriers by RNA Tumor Profiling
Source: PubMed Central journal article supplement (PMC3660328; doi:10.1371/journal.pone.0064268), 2013-05-21
Supplement: pone.0064268.s005.pdf [file pone.0064268.s005.pdf]

**Table S1.** *BRCA1/2* germline mutations and its relation to molecular tumor subtypes. Mutations are all known pathogenic mutation described using HGVS nomenclature.

|                                                          | Basal | HER2 | LumA | LumB | Normal | Functional effects |
|----------------------------------------------------------|-------|------|------|------|--------|--------------------|
| <b>BRCA1</b>                                             |       |      |      |      |        |                    |
| c.115T>G, Exon3, p.(Cys39Gly)                            | -     | -    | -    | 1    | -      | MS                 |
| c.181T>G, Exon5, p.(Cys61Gly)                            | 2     | -    | -    | -    | 1      | MS                 |
| c.1082_1092del, Exon11, p.(Ser361*)                      | -     | -    | 1    | -    | -      | NS                 |
| c.1505delT, Exon11, p.(Leu502*)                          | 1     | -    | -    | -    | -      | FS                 |
| c.1556delA, Exon11, p.(Lys519Argfs*13)                   | 1     | -    | -    | -    | -      | FS                 |
| c.2475delC, Exon11, p.(Asp825Glufs*21)                   | 1     | -    | -    | 3    | -      | FS                 |
| c.2476delA, Exon11, p.(Thr826Glnfs*20)                   | 1     | -    | -    | 1    | -      | FS                 |
| c.3319G>T, Exon11, p.(Glu1107*)                          | 2     | -    | -    | -    | -      | NS                 |
| c.3400G>T, Exon11, p.(Glu1134*)                          | 1     | 1    | -    | -    | -      | NS                 |
| c.4389C>A, Exon14, p.(Tyr1463*)                          | -     | 1    | -    | -    | -      | NS                 |
| c.5089T>C, Exon18, p.(Cys1697Arg)                        | 3     | -    | -    | -    | -      | MS                 |
| c.5143A>C, Exon18, p.(Ser1715Arg)                        | 1     | -    | -    | -    | -      | MS                 |
| c.5213G>A, Exon20, p.(Gly1738Glu)                        | 3     | -    | -    | -    | -      | MS                 |
| c.5266dupC, Exon20, p.(Gln1756Profs*74)                  | 3     | -    | -    | 1    | -      | FS                 |
| c.5503C>T, Exon24, p.(Arg1835*)                          | -     | -    | -    | 1    | -      | FS                 |
| c.5153-?_5193+?del, Exon19, p.(Trp1718Serfs*2)           | 1     | -    | -    | -    | -      | Exon del. (FS)     |
| c.4987-?_5193+?del, Exon17-19,<br>p.(Met1663_Glu1731del) | -     | -    | -    | 2    | -      | Exon del. (IF)     |
| <b>BRCA2</b>                                             |       |      |      |      |        |                    |
| c.145G>T, Exon3, p.(Glu49*)                              | -     | -    | -    | -    | 1      | NS                 |
| c.1310_1313delAAGA, Exon10, p.(Lys437Ilefs*22)           | -     | -    | -    | 2    | -      | FS                 |
| c.1813delA, Exon10, p.(Ile605Tyrfs*9)                    | 1     | -    | -    | -    | -      | FS                 |
| c.2808_2811delACAA, Exon11,<br>p.(Ala938Profs*21)        | -     | -    | -    | 2    | -      | FS                 |
| c.2830A>T, Exon11, p.(Lys944*)                           | -     | -    | -    | 3    | -      | NS                 |
| c.3530_3533delACAG, Exon11,<br>p.(Asp1177Alafs*19)       | -     | -    | -    | 1    | -      | FS                 |
| c.5576_5579delTTAA, Exon11, p.(Ile1859Lysfs*3)           | -     | -    | 1    | -    | -      | FS                 |
| c.5754delT, Exon11, p.(His1918Glnfs*45)                  | 1     | -    | -    | -    | -      | FS                 |
| c.6373delA, Exon11, p.(Thr2125Profs*12)                  | -     | -    | -    | 1    | -      | FS                 |
| c.6486_6489delACAA, Exon11,<br>p.(Lys2162Asnfs*5)        | -     | -    | 1    | 2    | -      | FS                 |
| c.6490_6492delinsGACT, Exon11,<br>p.(Gln2164Aspfs*12)    | -     | -    | -    | 1    | -      | FS                 |
| c.6601delT, Exon11, p.(Ser2201Leufs*5)                   | -     | -    | -    | 1    | -      | FS                 |
| c.8575delC, Exon20, p.(Gln2859Lysfs*4)                   | -     | -    | 1    | 1    | -      | FS                 |
| c.9015delA, Exon23, p.(Arg3005Serfs*23)                  | -     | -    | -    | 1    | -      | FS                 |
| c.7617+1G>A, Splice mut, Exon15 skipping                 | -     | -    | -    | 1    | -      | Exon skipping      |

Abbreviations: MS, missense mutation; FS, frameshift mutation; NS, nonsense mutation; IF, in-frame mutation
