# Supplementary material for: Classifications within Molecular Subtypes Enables Identification of BRCA1/BRCA2 Mutation Carriers by RNA Tumor Profiling
Source: PubMed Central journal article supplement (PMC3660328; doi:10.1371/journal.pone.0064268), 2013-05-21
Supplement: pone.0064268.s006.pdf [file pone.0064268.s006.pdf]

**Table S2.** Patient and tumor characteristics of *BRCA1* mutation carriers in relation to molecular subtypes

| <i>BRCA1</i> tumors          | Basal<br>(n = 20) | HER2<br>(n = 2) | LumA<br>(n = 1) | LumB<br>(n = 9) | Normal<br>(n = 1) |
|------------------------------|-------------------|-----------------|-----------------|-----------------|-------------------|
| <b>Estrogen receptor</b>     |                   |                 |                 |                 |                   |
| ER+                          | 2                 | 2               | 1               | 9               | 0                 |
| ER-                          | 18                | 0               | 0               | 0               | 1                 |
| <b>Progesterone receptor</b> |                   |                 |                 |                 |                   |
| PR+                          | 0                 | 2               | 1               | 3               | 1                 |
| PR-                          | 20                | 0               | 0               | 6               | 0                 |
| <b>HER2 status</b>           |                   |                 |                 |                 |                   |
| HER2+                        | 0                 | 2               | 0               | 1               | 0                 |
| HER2-                        | 20                | 0               | 1               | 8               | 1                 |
| <b>Histologic grade</b>      |                   |                 |                 |                 |                   |
| Grade 1                      | 0                 | 0               | 0               | 3               | 0                 |
| Grade 2                      | 4                 | 0               | 1               | 1               | 1                 |
| Grade 3                      | 12                | 2               | 0               | 4               | 0                 |
| NA                           | 4                 | 0               | 0               | 1               | 0                 |
| <b>Tumor type</b>            |                   |                 |                 |                 |                   |
| Invasive ductal carcinoma    | 16                | 2               | 1               | 8               | 1                 |
| Invasive lobular carcinoma   | 1                 | 0               | 0               | 0               | 0                 |
| Mucinous carcinoma           | 0                 | 0               | 0               | 0               | 0                 |
| Medullary carcinoma          | 2                 | 0               | 0               | 0               | 0                 |
| Tubular carcinoma            | 0                 | 0               | 0               | 0               | 0                 |
| Metaplastic carcinoma        | 0                 | 0               | 0               | 0               | 0                 |
| Other                        | 0                 | 0               | 0               | 0               | 0                 |
| NA                           | 1                 | 0               | 0               | 1               | 0                 |
| <b>Age</b>                   |                   |                 |                 |                 |                   |
| < 50 years                   | 14                | 2               | 1               | 3               | 1                 |
| ≥ 50 years                   | 6                 | 0               | 0               | 6               | 0                 |
| <b>Menopause status</b>      |                   |                 |                 |                 |                   |
| Premenopausal                | 14                | 2               | 1               | 2               | 1                 |
| Perimenopausal               | 0                 | 0               | 0               | 0               | 0                 |
| Postmenopausal               | 5                 | 0               | 0               | 7               | 0                 |
| Other                        | 0                 | 0               | 0               | 0               | 0                 |
| NA                           | 0                 | 0               | 0               | 0               | 0                 |
