# Supplementary material for: Classifications within Molecular Subtypes Enables Identification of BRCA1/BRCA2 Mutation Carriers by RNA Tumor Profiling
Source: PubMed Central journal article supplement (PMC3660328; doi:10.1371/journal.pone.0064268), 2013-05-21
Supplement: pone.0064268.s008.pdf [file pone.0064268.s008.pdf]

**Table S4.** Patient and tumor characteristics of sporadic patients in relation to molecular subtypes

| <b>Sporadic tumors</b>       | <b>Basal<br/>(n = 10)</b> | <b>HER2<br/>(n = 14)</b> | <b>LumA<br/>(n = 55)</b> | <b>LumB<br/>(n = 48)</b> | <b>Normal<br/>(n = 1)</b> |
|------------------------------|---------------------------|--------------------------|--------------------------|--------------------------|---------------------------|
| <b>Estrogen receptor</b>     |                           |                          |                          |                          |                           |
| ER+                          | 0                         | 3                        | 55                       | 48                       | 1                         |
| ER-                          | 10                        | 11                       | 0                        | 0                        | 0                         |
| <b>Progesterone receptor</b> |                           |                          |                          |                          |                           |
| PR+                          | 0                         | 1                        | 47                       | 30                       | 1                         |
| PR-                          | 10                        | 13                       | 8                        | 18                       | 0                         |
| <b>HER2 status</b>           |                           |                          |                          |                          |                           |
| HER2+                        | 1                         | 13                       | 4                        | 3                        | 0                         |
| HER2-                        | 9                         | 1                        | 51                       | 45                       | 1                         |
| <b>Histologic grade</b>      |                           |                          |                          |                          |                           |
| Grade 1                      | 1                         | 0                        | 27                       | 4                        | 0                         |
| Grade 2                      | 0                         | 4                        | 19                       | 25                       | 0                         |
| Grade 3                      | 8                         | 9                        | 0                        | 11                       | 1                         |
| NA                           | 1                         | 1                        | 9                        | 8                        | 0                         |
| <b>Tumor type</b>            |                           |                          |                          |                          |                           |
| Invasive ductal carcinoma    | 10                        | 13                       | 42                       | 39                       | 1                         |
| Invasive lobular carcinoma   | 0                         | 0                        | 9                        | 3                        | 0                         |
| Mucinous carcinoma           | 0                         | 0                        | 1                        | 1                        | 0                         |
| Medullary carcinoma          | 0                         | 0                        | 0                        | 1                        | 0                         |
| Tubular carcinoma            | 0                         | 0                        | 2                        | 1                        | 0                         |
| Metaplastic carcinoma        | 0                         | 0                        | 0                        | 0                        | 0                         |
| Other                        | 0                         | 0                        | 0                        | 2                        | 0                         |
| NA                           | 0                         | 1                        | 1                        | 1                        | 0                         |
| <b>Age</b>                   |                           |                          |                          |                          |                           |
| < 50 years                   | 0                         | 3                        | 8                        | 9                        | 1                         |
| ≥ 50 years                   | 10                        | 11                       | 47                       | 39                       | 0                         |
| <b>Menopause status</b>      |                           |                          |                          |                          |                           |
| Premenopausal                | 1                         | 3                        | 12                       | 13                       | 1                         |
| Perimenopausal               | 2                         | 2                        | 4                        | 7                        | 0                         |
| Postmenopausal               | 6                         | 8                        | 37                       | 27                       | 0                         |
| Other                        | 0                         | 0                        | 2                        | 0                        | 0                         |
| NA                           | 1                         | 1                        | 0                        | 1                        | 0                         |
