# Supplementary material for: Classifications within Molecular Subtypes Enables Identification of BRCA1/BRCA2 Mutation Carriers by RNA Tumor Profiling
Source: PubMed Central journal article supplement (PMC3660328; doi:10.1371/journal.pone.0064268), 2013-05-21
Supplement: pone.0064268.s009.pdf [file pone.0064268.s009.pdf]

**Table S5.** Evaluation of the general *BRCA1* and *BRCA2* classifications within each of the molecular subtype sample groups

|                                    | No. of samples<br>( <i>BRCA1</i> / sporadic) | Sensitivity<br>(TP) | Specificity<br>(TN) | Accuracy <sup>a</sup> | <i>p</i> -value <sup>b</sup> |
|------------------------------------|----------------------------------------------|---------------------|---------------------|-----------------------|------------------------------|
| <b><i>BRCA1</i> classification</b> |                                              |                     |                     |                       |                              |
| Basal-like                         | 20 / 10                                      | 0.95 (19)           | 0.00 (0)            | 0.48                  | 1.00                         |
| HER2-enriched                      | 2 / 14                                       | 0.00 (0)            | 0.79 (11)           | 0.39                  | 1.00                         |
| Luminal A                          | 1 / 55                                       | 1.00 (1)            | 0.96 (53)           | 0.98                  | 0.05                         |
| Luminal B                          | 9 / 48                                       | 0.33 (3)            | 0.92 (44)           | 0.63                  | 0.07                         |
| Normal-like                        | 1 / 1                                        | 0.00 (0)            | 1.00 (1)            | 0.50                  | 1.00                         |
|                                    | No. of samples<br>( <i>BRCA2</i> / sporadic) | Sensitivity<br>(TP) | Specificity<br>(TN) | Accuracy <sup>a</sup> | <i>p</i> -value <sup>b</sup> |
| <b><i>BRCA2</i> classification</b> |                                              |                     |                     |                       |                              |
| Basal-like                         | 2 / 10                                       | 1.00 (2)            | 0.90 (9)            | 0.95                  | 0.04                         |
| HER2-enriched                      | 0 / 14                                       | -                   | 0.79 (11)           | -                     | -                            |
| Luminal A                          | 3 / 55                                       | 0.33 (1)            | 0.89 (49)           | 0.61                  | 0.33                         |
| Luminal B                          | 16 / 48                                      | 0.88 (14)           | 0.81 (39)           | 0.84                  | 1.4×10 <sup>-6</sup>         |
| Normal-like                        | 1 / 1                                        | 1.00 (1)            | 1.00 (1)            | 1.00                  | 1.00                         |

<sup>a</sup> Mean balanced accuracy

<sup>b</sup> Fisher's exact test

Abbreviations: TP, true positive; TN, true negative
