# Supplementary material for: Classifications within Molecular Subtypes Enables Identification of BRCA1/BRCA2 Mutation Carriers by RNA Tumor Profiling
Source: PubMed Central journal article supplement (PMC3660328; doi:10.1371/journal.pone.0064268), 2013-05-21
Supplement: pone.0064268.s010.pdf [file pone.0064268.s010.pdf]

**Table S6.** *BRCA1* classification results of basal-like *BRCA1* ( $n = 20$ ) and basal-like sporadic ( $n = 10$ ) tumors obtained using leave-one-out cross-validation. See Materials and methods section for more details. Mutations are all known pathogenic mutation described using HGVS nomenclature.

| SampleID | Group        | Age | Prediction   | Type      | Grade | Mutation                                                    | Functional effects |
|----------|--------------|-----|--------------|-----------|-------|-------------------------------------------------------------|--------------------|
| A018     | <i>BRCA1</i> | 25  | <i>BRCA1</i> | IDC       | 2     | <i>BRCA1</i> c.181T>G, Exon5, p.(Cys61Gly)                  | MS                 |
| A136     | <i>BRCA1</i> | 31  | <i>BRCA1</i> | IDC       | 3     | <i>BRCA1</i> c.5266dupC, Exon20, p.(Gln1756Profs*74)        | FS                 |
| A089     | <i>BRCA1</i> | 32  | <i>BRCA1</i> | IDC       | 3     | <i>BRCA1</i> c.181T>G, Exon5, p.(Cys61Gly)                  | MS                 |
| A140     | <i>BRCA1</i> | 32  | <i>BRCA1</i> | ILC       | NA    | <i>BRCA1</i> c.1505delT, Exon11, p.(Leu502*)                | NS                 |
| A122     | <i>BRCA1</i> | 36  | <i>BRCA1</i> | IDC       | 3     | <i>BRCA1</i> c.3319G>T, Exon11, p.(Glu1107*)                | NS                 |
| A002     | <i>BRCA1</i> | 36  | <i>BRCA1</i> | IDC       | 3     | <i>BRCA1</i> c.1556delA, Exon11, p.(Lys519Argfs*13)         | FS                 |
| A017     | <i>BRCA1</i> | 37  | <i>BRCA1</i> | NA        | NA    | <i>BRCA1</i> c.2476delA, Exon11, p.(Thr826Glnfs*20)         | FS                 |
| A134     | <i>BRCA1</i> | 38  | <i>BRCA1</i> | IDC       | 3     | <i>BRCA1</i> c.5266dupC, Exon20, p.(Gln1756Profs*74)        | FS                 |
| A014     | <i>BRCA1</i> | 40  | Sporadic     | IDC       | 3     | <i>BRCA1</i> c.5266dupC, Exon20, p.(Gln1756Profs*74)        | FS                 |
| A087     | <i>BRCA1</i> | 41  | <i>BRCA1</i> | IDC       | 3     | <i>BRCA1</i> c.5089T>C, Exon18, p.(Cys1697Arg)              | MS                 |
| A142     | <i>BRCA1</i> | 41  | Sporadic     | IDC       | 2     | <i>BRCA1</i> c.5089T>C, Exon18, p.(Cys1697Arg)              | MS                 |
| A112     | <i>BRCA1</i> | 42  | Sporadic     | IDC       | 3     | <i>BRCA1</i> c.5213G>A, Exon20, p.(Gly1738Glu)              | MS                 |
| A156     | <i>BRCA1</i> | 45  | <i>BRCA1</i> | IDC       | 3     | <i>BRCA1</i> c.3319G>T, Exon11, p.(Glu1107*)                | NS                 |
| A015     | <i>BRCA1</i> | 46  | <i>BRCA1</i> | Medullary | NA    | <i>BRCA1</i> c.5213G>A, Exon20, p.(Gly1738Glu)              | MS                 |
| A006     | <i>BRCA1</i> | 52  | <i>BRCA1</i> | IDC       | 3     | <i>BRCA1</i> c.5089T>C, Exon18, p.(Cys1697Arg)              | MS                 |
| A051     | <i>BRCA1</i> | 55  | <i>BRCA1</i> | IDC       | 3     | <i>BRCA1</i> c.5143A>C, Exon18, p.(Ser1715Arg)              | MS                 |
| A138     | <i>BRCA1</i> | 55  | <i>BRCA1</i> | IDC       | 3     | <i>BRCA1</i> c.2475delC, Exon11, p.(Asp825Glufs*21)         | FS                 |
| A126     | <i>BRCA1</i> | 56  | <i>BRCA1</i> | IDC       | 2     | <i>BRCA1</i> c.5213G>A, Exon20, p.(Gly1738Glu)              | MS                 |
| A145     | <i>BRCA1</i> | 60  | <i>BRCA1</i> | IDC       | 2     | <i>BRCA1</i> c.5153-?_5193+?del, Exon19, p.(Trp1718Serfs*2) | Exon del (FS)      |
| A131     | <i>BRCA1</i> | 61  | <i>BRCA1</i> | Medullary | NA    | <i>BRCA1</i> c.3400G>T, Exon11, p.(Glu1134*)                | NS                 |
| K005     | Sporadic     | 53  | Sporadic     | IDC       | 3     |                                                             |                    |
| K085     | Sporadic     | 55  | Sporadic     | IDC       | 3     |                                                             |                    |
| K018     | Sporadic     | 60  | <i>BRCA1</i> | IDC       | 3     |                                                             |                    |
| K073     | Sporadic     | 66  | Sporadic     | IDC       | 3     |                                                             |                    |
| K170     | Sporadic     | 69  | Sporadic     | IDC       | 3     |                                                             |                    |
| K053     | Sporadic     | 75  | Sporadic     | IDC       | 3     |                                                             |                    |
| K041     | Sporadic     | 75  | <i>BRCA1</i> | IDC       | 3     |                                                             |                    |
| K145     | Sporadic     | 76  | Sporadic     | IDC       | NA    |                                                             |                    |
| K001     | Sporadic     | 76  | Sporadic     | IDC       | 3     |                                                             |                    |
| K177     | Sporadic     | 87  | Sporadic     | IDC       | 1     |                                                             |                    |

Abbreviations: MS, missense mutation; FS, frameshift mutation; NS, nonsense mutation
