# Supplementary material for: Classifications within Molecular Subtypes Enables Identification of BRCA1/BRCA2 Mutation Carriers by RNA Tumor Profiling
Source: PubMed Central journal article supplement (PMC3660328; doi:10.1371/journal.pone.0064268), 2013-05-21
Supplement: pone.0064268.s011.pdf [file pone.0064268.s011.pdf]

**Table S7.** *BRCA1* classification results of lumB *BRCA1* ( $n = 9$ ) and lumB sporadic ( $n = 48$ ) tumors obtained using leave-one-out cross-validation. See Materials and methods section for more details. Mutations are all known pathogenic mutation described using HGVS nomenclature.

| SampleID | Group        | Age | Prediction   | WHO       | Grade | Mutation                                                           | Functional effects |
|----------|--------------|-----|--------------|-----------|-------|--------------------------------------------------------------------|--------------------|
| A086     | <i>BRCA1</i> | 28  | Sporadic     | IDC       | 1     | <i>BRCA1</i> c.2475delC, Exon11, p.(Asp825Gluufs*21)               | FS                 |
| A016     | <i>BRCA1</i> | 39  | <i>BRCA1</i> | IDC       | 1     | <i>BRCA1</i> c.2476delA, Exon11, p.(Thr826Glnfs*20)                | FS                 |
| A120     | <i>BRCA1</i> | 46  | Sporadic     | NA        | NA    | <i>BRCA1</i> c.2475delC, Exon11, p.(Asp825Gluufs*21)               | FS                 |
| A129     | <i>BRCA1</i> | 52  | Sporadic     | IDC       | 1     | <i>BRCA1</i> c.115T>G, Exon3, p.(Cys39Gly)                         | MS                 |
| A133     | <i>BRCA1</i> | 57  | <i>BRCA1</i> | IDC       | 3     | <i>BRCA1</i> c.5266dupC, Exon20, p.(Gln1756Profs*74)               | FS                 |
| A007     | <i>BRCA1</i> | 57  | Sporadic     | IDC       | 2     | <i>BRCA1</i> c.5503C>T, Exon24, p.(Arg1835*)                       | NS                 |
| A125     | <i>BRCA1</i> | 62  | <i>BRCA1</i> | IDC       | 3     | <i>BRCA1</i> c.2475delC, Exon11, p.(Asp825Gluufs*21)               | FS                 |
| A170     | <i>BRCA1</i> | 72  | Sporadic     | IDC       | 3     | <i>BRCA1</i> c.4987-?_5193+?del, Exon17-19, p.(Met1663_Glu1731del) | Exon del (IF)      |
| A174     | <i>BRCA1</i> | 74  | <i>BRCA1</i> | IDC       | 3     | <i>BRCA1</i> c.4987-?_5193+2del, Exon17-19, p.(Met1663_Glu1731del) | Exon del (IF)      |
| K058     | Sporadic     | 36  | Sporadic     | IDC       | 3     | -                                                                  |                    |
| K046     | Sporadic     | 43  | Sporadic     | IDC       | 3     | -                                                                  |                    |
| K083     | Sporadic     | 43  | Sporadic     | IDC       | 3     | -                                                                  |                    |
| K079     | Sporadic     | 43  | Sporadic     | IDC       | 3     | -                                                                  |                    |
| K011     | Sporadic     | 44  | Sporadic     | IDC       | 3     | -                                                                  |                    |
| K123     | Sporadic     | 44  | Sporadic     | IDC       | 2     | -                                                                  |                    |
| K088     | Sporadic     | 47  | Sporadic     | IDC       | 2     | -                                                                  |                    |
| K074     | Sporadic     | 48  | Sporadic     | ILC       | 2     | -                                                                  |                    |
| K021     | Sporadic     | 49  | Sporadic     | IDC       | 2     | -                                                                  |                    |
| K056     | Sporadic     | 50  | Sporadic     | IDC       | 1     | -                                                                  |                    |
| K113     | Sporadic     | 50  | Sporadic     | IDC       | 1     | -                                                                  |                    |
| K114     | Sporadic     | 50  | <i>BRCA1</i> | IDC       | 2     | -                                                                  |                    |
| K057     | Sporadic     | 51  | Sporadic     | IDC       | 2     | -                                                                  |                    |
| K064     | Sporadic     | 51  | Sporadic     | IDC       | 2     | -                                                                  |                    |
| K089     | Sporadic     | 53  | Sporadic     | IDC       | 2     | -                                                                  |                    |
| K055     | Sporadic     | 54  | <i>BRCA1</i> | Medullary | NA    | -                                                                  |                    |
| K052     | Sporadic     | 58  | <i>BRCA1</i> | IDC       | 3     | -                                                                  |                    |
| K148     | Sporadic     | 60  | Sporadic     | IDC       | 3     | -                                                                  |                    |
| K082     | Sporadic     | 60  | Sporadic     | IDC       | 2     | -                                                                  |                    |
| K155     | Sporadic     | 61  | Sporadic     | IDC       | 2     | -                                                                  |                    |
| K043     | Sporadic     | 63  | Sporadic     | IDC       | 2     | -                                                                  |                    |
| K031     | Sporadic     | 64  | Sporadic     | IDC       | 2     | -                                                                  |                    |
| K086     | Sporadic     | 64  | Sporadic     | IDC       | 2     | -                                                                  |                    |
| K108     | Sporadic     | 64  | Sporadic     | ILC       | NA    | -                                                                  |                    |
| K147     | Sporadic     | 65  | Sporadic     | IDC       | 2     | -                                                                  |                    |
| K179     | Sporadic     | 66  | Sporadic     | IDC       | 2     | -                                                                  |                    |
| K013     | Sporadic     | 69  | Sporadic     | Other     | NA    | -                                                                  |                    |
| K175     | Sporadic     | 71  | <i>BRCA1</i> | IDC       | 3     | -                                                                  |                    |
| K120     | Sporadic     | 72  | <i>BRCA1</i> | IDC       | 2     | -                                                                  |                    |
| K151     | Sporadic     | 72  | Sporadic     | IDC       | 2     | -                                                                  |                    |
| K142     | Sporadic     | 74  | Sporadic     | NA        | NA    | -                                                                  |                    |
| K091     | Sporadic     | 74  | <i>BRCA1</i> | IDC       | 3     | -                                                                  |                    |
| K003     | Sporadic     | 75  | Sporadic     | IDC       | 2     | -                                                                  |                    |
| K150     | Sporadic     | 75  | Sporadic     | IDC       | 2     | -                                                                  |                    |
| K062     | Sporadic     | 75  | Sporadic     | IDC       | 2     | -                                                                  |                    |
| K133     | Sporadic     | 76  | <i>BRCA1</i> | Other     | NA    | -                                                                  |                    |
| K027     | Sporadic     | 77  | Sporadic     | IDC       | 2     | -                                                                  |                    |
| K019     | Sporadic     | 78  | Sporadic     | IDC       | 2     | -                                                                  |                    |
| K128     | Sporadic     | 81  | <i>BRCA1</i> | IDC       | 2     | -                                                                  |                    |
| K054     | Sporadic     | 82  | Sporadic     | IDC       | 3     | -                                                                  |                    |
| K171     | Sporadic     | 83  | Sporadic     | IDC       | 1     | -                                                                  |                    |
| K165     | Sporadic     | 85  | Sporadic     | IDC       | 1     | -                                                                  |                    |
| K038     | Sporadic     | 85  | <i>BRCA1</i> | IDC       | 2     | -                                                                  |                    |
| K101     | Sporadic     | 85  | Sporadic     | ILC       | NA    | -                                                                  |                    |
| K080     | Sporadic     | 86  | Sporadic     | Tubular   | NA    | -                                                                  |                    |
| K066     | Sporadic     | 87  | <i>BRCA1</i> | Mucinous  | NA    | -                                                                  |                    |
| K154     | Sporadic     | 88  | Sporadic     | IDC       | 3     | -                                                                  |                    |
| K045     | Sporadic     | 89  | Sporadic     | IDC       | 2     | -                                                                  |                    |

Abbreviations: MS, missense mutation; FS, frameshift mutation; NS, nonsense mutation; IF, in-frame mutation
