# Supplementary material for: Classifications within Molecular Subtypes Enables Identification of BRCA1/BRCA2 Mutation Carriers by RNA Tumor Profiling
Source: PubMed Central journal article supplement (PMC3660328; doi:10.1371/journal.pone.0064268), 2013-05-21
Supplement: pone.0064268.s012.pdf [file pone.0064268.s012.pdf]

**Table S8.** *BRCA2* classification results of lumB *BRCA2* ( $n = 16$ ) and lumB sporadic ( $n = 48$ ) tumors obtained using leave-one-out cross-validation. See Materials and methods section for more details. Mutations are all known pathogenic mutation described using HGVS nomenclature.

| SampleID | Group        | Age | Prediction   | WHO       | Grade | Mutation                                                        | Functional effects |
|----------|--------------|-----|--------------|-----------|-------|-----------------------------------------------------------------|--------------------|
| A013     | <i>BRCA2</i> | 28  | Sporadic     | IDC       | 3     | <i>BRCA2</i> c.2830A>T, Exon11, p.(Lys944*)                     | NS                 |
| A109     | <i>BRCA2</i> | 31  | <i>BRCA2</i> | IDC       | 2     | <i>BRCA2</i> c.1310_1313delAAGA, Exon10, p.(Lys437Ilefs*22)     | FS                 |
| A010     | <i>BRCA2</i> | 34  | <i>BRCA2</i> | IDC       | 2     | <i>BRCA2</i> c.2808_2811delACAA, Exon11, p.(Ala938Profs*21)     | FS                 |
| A150     | <i>BRCA2</i> | 36  | <i>BRCA2</i> | IDC       | 2     | <i>BRCA2</i> c.6486_6489delACAA, Exon11, p.(Lys2162Asnfs*5)     | FS                 |
| A095     | <i>BRCA2</i> | 37  | <i>BRCA2</i> | IDC       | 3     | <i>BRCA2</i> c.6490_6492delinsGACT, Exon11, p.(Gln2164Aspfs*12) | FS                 |
| A019     | <i>BRCA2</i> | 38  | <i>BRCA2</i> | IDC       | 3     | <i>BRCA2</i> c.6373delA, Exon11, p.(Thr2125Profs*12)            | FS                 |
| A004     | <i>BRCA2</i> | 41  | <i>BRCA2</i> | IDC       | 2     | <i>BRCA2</i> c.2830A>T, Exon11, p.(Lys944*)                     | NS                 |
| A102     | <i>BRCA2</i> | 42  | <i>BRCA2</i> | IDC       | 2     | <i>BRCA2</i> c.7617+1G>A, Splice mut, Exon15 skipping           | Exon skipping      |
| A111     | <i>BRCA2</i> | 42  | Sporadic     | IDC       | 1     | <i>BRCA2</i> c.1310_1313delAAGA, Exon10, p.(Lys437Ilefs*22)     | FS                 |
| A117     | <i>BRCA2</i> | 45  | <i>BRCA2</i> | IDC       | 2     | <i>BRCA2</i> c.6601delT, Exon11, p.(Ser2201Leufs*5)             | FS                 |
| A108     | <i>BRCA2</i> | 45  | <i>BRCA2</i> | IDC       | 2     | <i>BRCA2</i> c.6486_6489delACAA, Exon11, p.(Lys2162Asnfs*5)     | FS                 |
| A003     | <i>BRCA2</i> | 48  | <i>BRCA2</i> | IDC       | 2     | <i>BRCA2</i> c.2830A>T, Exon11, p.(Lys944*)                     | NS                 |
| A106     | <i>BRCA2</i> | 60  | <i>BRCA2</i> | IDC       | 3     | <i>BRCA2</i> c.9015delA, Exon23, p.(Arg3005Serfs*23)            | FS                 |
| A173     | <i>BRCA2</i> | 63  | <i>BRCA2</i> | NA        | NA    | <i>BRCA2</i> c.8575delC, Exon20, p.(Gln2859Lysfs*4)             | FS                 |
| A163     | <i>BRCA2</i> | 66  | <i>BRCA2</i> | IDC       | 3     | <i>BRCA2</i> c.3530_3533delACAG, Exon11, p.(Asp1177Alafs*19)    | FS                 |
| A115     | <i>BRCA2</i> | 72  | <i>BRCA2</i> | IDC       | 3     | <i>BRCA2</i> c.2808_2811delACAA, Exon11, p.(Ala938Profs*21)     | FS                 |
| K058     | Sporadic     | 36  | Sporadic     | IDC       | 3     | -                                                               | -                  |
| K046     | Sporadic     | 43  | Sporadic     | IDC       | 3     | -                                                               | -                  |
| K083     | Sporadic     | 43  | <i>BRCA2</i> | IDC       | 3     | -                                                               | -                  |
| K079     | Sporadic     | 43  | Sporadic     | IDC       | 3     | -                                                               | -                  |
| K011     | Sporadic     | 44  | <i>BRCA2</i> | IDC       | 3     | -                                                               | -                  |
| K123     | Sporadic     | 44  | Sporadic     | IDC       | 2     | -                                                               | -                  |
| K088     | Sporadic     | 47  | Sporadic     | IDC       | 2     | -                                                               | -                  |
| K074     | Sporadic     | 48  | Sporadic     | ILC       | 2     | -                                                               | -                  |
| K021     | Sporadic     | 49  | Sporadic     | IDC       | 2     | -                                                               | -                  |
| K056     | Sporadic     | 50  | Sporadic     | IDC       | 1     | -                                                               | -                  |
| K113     | Sporadic     | 50  | Sporadic     | IDC       | 1     | -                                                               | -                  |
| K114     | Sporadic     | 50  | Sporadic     | IDC       | 2     | -                                                               | -                  |
| K057     | Sporadic     | 51  | Sporadic     | IDC       | 2     | -                                                               | -                  |
| K064     | Sporadic     | 51  | Sporadic     | IDC       | 2     | -                                                               | -                  |
| K089     | Sporadic     | 53  | Sporadic     | IDC       | 2     | -                                                               | -                  |
| K055     | Sporadic     | 54  | Sporadic     | Medullary | NA    | -                                                               | -                  |
| K052     | Sporadic     | 58  | Sporadic     | IDC       | 3     | -                                                               | -                  |
| K148     | Sporadic     | 60  | Sporadic     | IDC       | 3     | -                                                               | -                  |
| K082     | Sporadic     | 60  | Sporadic     | IDC       | 2     | -                                                               | -                  |
| K155     | Sporadic     | 61  | Sporadic     | IDC       | 2     | -                                                               | -                  |
| K043     | Sporadic     | 63  | Sporadic     | IDC       | 2     | -                                                               | -                  |
| K031     | Sporadic     | 64  | Sporadic     | IDC       | 2     | -                                                               | -                  |
| K086     | Sporadic     | 64  | Sporadic     | IDC       | 2     | -                                                               | -                  |
| K108     | Sporadic     | 64  | Sporadic     | ILC       | NA    | -                                                               | -                  |
| K147     | Sporadic     | 65  | Sporadic     | IDC       | 2     | -                                                               | -                  |
| K179     | Sporadic     | 66  | Sporadic     | IDC       | 2     | -                                                               | -                  |
| K013     | Sporadic     | 69  | Sporadic     | Other     | NA    | -                                                               | -                  |
| K175     | Sporadic     | 71  | Sporadic     | IDC       | 3     | -                                                               | -                  |
| K120     | Sporadic     | 72  | Sporadic     | IDC       | 2     | -                                                               | -                  |
| K151     | Sporadic     | 72  | Sporadic     | IDC       | 2     | -                                                               | -                  |
| K142     | Sporadic     | 74  | Sporadic     | NA        | NA    | -                                                               | -                  |
| K091     | Sporadic     | 74  | <i>BRCA2</i> | IDC       | 3     | -                                                               | -                  |
| K003     | Sporadic     | 75  | Sporadic     | IDC       | 2     | -                                                               | -                  |
| K150     | Sporadic     | 75  | Sporadic     | IDC       | 2     | -                                                               | -                  |
| K062     | Sporadic     | 75  | <i>BRCA2</i> | IDC       | 2     | -                                                               | -                  |
| K133     | Sporadic     | 76  | Sporadic     | Other     | NA    | -                                                               | -                  |
| K027     | Sporadic     | 77  | Sporadic     | IDC       | 2     | -                                                               | -                  |
| K019     | Sporadic     | 78  | Sporadic     | IDC       | 2     | -                                                               | -                  |
| K128     | Sporadic     | 81  | <i>BRCA2</i> | IDC       | 2     | -                                                               | -                  |
| K054     | Sporadic     | 82  | Sporadic     | IDC       | 3     | -                                                               | -                  |
| K171     | Sporadic     | 83  | Sporadic     | IDC       | 1     | -                                                               | -                  |
| K165     | Sporadic     | 85  | Sporadic     | IDC       | 1     | -                                                               | -                  |
| K038     | Sporadic     | 85  | Sporadic     | IDC       | 2     | -                                                               | -                  |
| K101     | Sporadic     | 85  | Sporadic     | ILC       | NA    | -                                                               | -                  |
| K080     | Sporadic     | 86  | Sporadic     | Tubular   | NA    | -                                                               | -                  |
| K066     | Sporadic     | 87  | Sporadic     | Mucinous  | NA    | -                                                               | -                  |
| K154     | Sporadic     | 88  | Sporadic     | IDC       | 3     | -                                                               | -                  |
| K045     | Sporadic     | 89  | Sporadic     | IDC       | 2     | -                                                               | -                  |

Abbreviations: FS, frameshift mutation; NS, nonsense mutation
