# Supplementary material for: Classifications within Molecular Subtypes Enables Identification of BRCA1/BRCA2 Mutation Carriers by RNA Tumor Profiling
Source: PubMed Central journal article supplement (PMC3660328; doi:10.1371/journal.pone.0064268), 2013-05-21
Supplement: pone.0064268.s013.pdf [file pone.0064268.s013.pdf]

**Table S9.** The basal *BRCA1* signature. 76 out of 110 genes were contained on the Rosetta chip used in the NKI study and 69 genes were present in the Jönsson dataset (indicated by ×)

|              | NKI | Jönsson |              | NKI | Jönsson |
|--------------|-----|---------|--------------|-----|---------|
| AZGP1P1      |     | x       | OR2T2        |     |         |
| AZGP1        | x   |         | C6orf126     |     |         |
| NKX3-1       | x   |         | C11orf41     | x   |         |
| FRMD4A       | x   | x       | STK31        |     | x       |
| SYNM         | x   |         | IGSF5        |     |         |
| LOC100507507 | x   |         | FLJ22763     |     |         |
| PET112       | x   |         | NKD2         |     | x       |
| ZKSCAN4      | x   | x       | CHRM1        | x   | x       |
| CHD7         | x   |         | DHRS7B       | x   | x       |
| NLK          | x   | x       | DNMT3B       | x   | x       |
| TUSC5        |     | x       | ALS2CL       |     | x       |
| PRKCA        | x   | x       | FADS3        | x   |         |
| TNFSF11      | x   | x       | EIF2B5       | x   | x       |
| KIAA0100     | x   | x       | SWT1         | x   |         |
| TMEM199      | x   | x       | LARP6        | x   | x       |
| EIF1AY       | x   | x       | TDRD5        |     | x       |
| SIX2         | x   | x       | ATP6AP2      | x   | x       |
| ADAMTS20     |     | x       | C2Oorf94     |     | x       |
| EIF1AX       |     |         | MAGEA8       | x   | x       |
| NTRK2        | x   | x       | METTL7A      | x   | x       |
| JARID2       | x   | x       | EPX          | x   | x       |
| SFRP1        | x   | x       | AQP7         | x   | x       |
| LOC389023    | x   |         | NCRNA00162   |     |         |
| PCK1         | x   |         | SERPINA3     | x   | x       |
| MAOB         | x   |         | SLC25A18     | x   | x       |
| ERAL1        | x   | x       | XLOC_014068  |     |         |
| SLC12A1      | x   | x       | EIF5A2       | x   | x       |
| CD36         | x   | x       | EFHD1        |     | x       |
| MCTP2        | x   | x       | DBI          | x   | x       |
| B9D1         | x   | x       | NCRNA00163   |     |         |
| MAOA         | x   | x       | LGALS12      | x   | x       |
| FRMD5        | x   | x       | RETSAT       | x   | x       |
| CSRP1        | x   | x       | XLOC_004323  |     |         |
| DYNLT3       | x   | x       | NEK3         | x   | x       |
| PPP1R1A      | x   | x       | KRTAP26-1    |     |         |
| LOC149773    |     |         | TMEM130      |     |         |
| OGFRL1       | x   | x       | C7orf46      | x   | x       |
| COMMD3       | x   | x       | CEP250       | x   | x       |
| TRAF4        | x   | x       | ITSN1        | x   |         |
| HIGD1C       |     |         | IFFO2        | x   | x       |
| PYY2         | x   |         | EGLN1        | x   | x       |
| TMEM26       |     |         | LOC644366    |     |         |
| C21orf59     | x   |         | CASK         | x   | x       |
| LOC442434    |     |         | SPZ1         |     |         |
| ASB7         | x   | x       | POPDC3       |     | x       |
| MAPK7        | x   | x       | LOC100509860 |     |         |
| MYB          | x   | x       | RPL23A       | x   |         |
| DPP10        | x   |         | ST5          | x   |         |
| FAM20C       |     |         | MBOAT2       | x   | x       |
| DMD          | x   | x       | PDRG1        | x   | x       |
| KREMEN1      | x   | x       | MED6         | x   | x       |
| MRPS36       | x   | x       | HMGB3P22     |     |         |
| LAMC2        | x   | x       | ZKSCAN3      | x   | x       |
| TUBAL3       |     |         | DENND2A      |     | x       |
| LOC100134285 |     |         | TMEM200C     |     |         |
