# Supplementary material for: Classifications within Molecular Subtypes Enables Identification of BRCA1/BRCA2 Mutation Carriers by RNA Tumor Profiling
Source: PubMed Central journal article supplement (PMC3660328; doi:10.1371/journal.pone.0064268), 2013-05-21
Supplement: pone.0064268.s014.pdf [file pone.0064268.s014.pdf]

**Table S10.** The lumB BRCA2 signature. 77 out of the 100 genes were present in the Jönsson dataset (indicated by

×)

|              | Jönsson |             | Jönsson |
|--------------|---------|-------------|---------|
| CCNA2        | x       | NKTR        | x       |
| SCYL2        | x       | PSMD3       | x       |
| DR1          | x       | EXOSC2      | x       |
| MRPS23       | x       | C1orf204    |         |
| PNPT1        | x       | DSC2        | x       |
| COQ2         | x       | TMPO        | x       |
| EIF4A3       | x       | RAB21       | x       |
| CDCA5        | x       | PATL1       | x       |
| SHCBP1       | x       | ZFAND2A     | x       |
| FEN1         | x       | ZBTB26      |         |
| MAD2L1       | x       | PPM1G       | x       |
| ANLN         | x       | EFTUD2      | x       |
| TIMM8A       | x       | XLOC_006922 |         |
| ASCC1        | x       | RABGEF1     | x       |
| OGT          | x       | TTC4        |         |
| CFL1         | x       | FRAS1       | x       |
| C12orf73     |         | G3BP2       | x       |
| ZWINT        | x       | COG8        | x       |
| MRPL49       | x       | STRN        | x       |
| PSMD12       | x       | POP1        |         |
| EEF2K        | x       | MED24       | x       |
| POLR2G       | x       | IL20        | x       |
| UBE2NL       |         | PILRB       | x       |
| COX6A1       | x       | CRADD       | x       |
| POLR2D       |         | ESPNL       |         |
| DPH3         | x       | CBX3        |         |
| FBXW2        | x       | USP30       | x       |
| RBM18        | x       | CAPN1       | x       |
| MRPS7        | x       | LOC283911   |         |
| FEM1C        | x       | TBC1D7      | x       |
| RBM5         | x       | LOC441268   |         |
| TIMM10       | x       | ANAPC10     |         |
| LOC100131564 |         | PSMA6       | x       |
| GATC         | x       | ATXN3       |         |
| GTPBP4       | x       | SCAF8       |         |
| C6orf97      | x       | IL24        | x       |
| FAM83D       | x       | TMEM181     | x       |
| RAN          | x       | ALDH6A1     | x       |
| RBMX2        | x       | CENPE       | x       |
| TTC3         |         | GLT8D1      | x       |
| CNTF         | x       | TMF1        | x       |
| TEX19        | x       | FTSJ2       | x       |
| ZFP91        | x       | MRS2        | x       |
| ABHD14A      | x       | SDHAF2      | x       |
| METTL6       |         | PPOX        | x       |
| BUB1         | x       | GTF2I       |         |
| INO80E       | x       | ANKRD30BL   |         |
| PION         |         | KIAA0391    | x       |
| PDCL3        |         | RAB11FIP2   | x       |
| PSMD14       | x       | FAT3        |         |
