# Supplementary material for: Classifications within Molecular Subtypes Enables Identification of BRCA1/BRCA2 Mutation Carriers by RNA Tumor Profiling
Source: PubMed Central journal article supplement (PMC3660328; doi:10.1371/journal.pone.0064268), 2013-05-21
Supplement: pone.0064268.s015.pdf [file pone.0064268.s015.pdf]

**Table S11.** Distribution of predicted molecular subtypes within the NKI dataset

|                     | <b>Basal-like</b> | <b>HER2-enriched</b> | <b>Luminal A</b> | <b>Luminal B</b> | <b>Normal-like</b> | <b>Total</b> |
|---------------------|-------------------|----------------------|------------------|------------------|--------------------|--------------|
| <b><i>BRCA1</i></b> | 16                | 1                    | 0                | 0                | 1                  | <b>18</b>    |
| <b><i>BRCA2</i></b> | 0                 | 0                    | 2                | 0                | 0                  | <b>2</b>     |
| <b>Sporadic</b>     | 18                | 12                   | 27               | 38               | 2                  | <b>97</b>    |
