# Supplementary material for: Classifications within Molecular Subtypes Enables Identification of BRCA1/BRCA2 Mutation Carriers by RNA Tumor Profiling
Source: PubMed Central journal article supplement (PMC3660328; doi:10.1371/journal.pone.0064268), 2013-05-21
Supplement: pone.0064268.s016.pdf [file pone.0064268.s016.pdf]

**Table S12.** Distribution of predicted molecular subtypes within the Jönsson dataset

|                           | <b>Basal-like</b> | <b>HER2-enriched</b> | <b>Luminal A</b> | <b>Luminal B</b> | <b>Normal-like</b> | <b>Total</b> |
|---------------------------|-------------------|----------------------|------------------|------------------|--------------------|--------------|
| <b><i>BRCA1</i></b>       | 13                | 0                    | 1                | 1                | 2                  | <b>17</b>    |
| <b><i>BRCA2</i></b>       | 4                 | 1                    | 5                | 21               | 0                  | <b>31</b>    |
| <b>Non-<i>BRCA1/2</i></b> | 19                | 19                   | 40               | 38               | 8                  | <b>124</b>   |
| <b>Sporadic</b>           | 34                | 31                   | 26               | 68               | 13                 | <b>172</b>   |
