# Supplementary material for: Classifications within Molecular Subtypes Enables Identification of BRCA1/BRCA2 Mutation Carriers by RNA Tumor Profiling
Source: PubMed Central journal article supplement (PMC3660328; doi:10.1371/journal.pone.0064268), 2013-05-21
Supplement: pone.0064268.s017.pdf [file pone.0064268.s017.pdf]

**Table S13.** BRCA1/2 classification results using the standard clinical variables ER, PR, HER2, TNBC (ER-/PR-/HER2-) and age of onset of disease.

|                                                 | No. of samples | Sensitivity (TP) | Specificity (TN) | Accuracy <sup>a</sup> | p-value <sup>b</sup> |
|-------------------------------------------------|----------------|------------------|------------------|-----------------------|----------------------|
| <b>BRCA1 vs. Sporadic</b>                       |                |                  |                  |                       |                      |
| ER                                              | 33 vs. 128     | 0.58 (19)        | 0.84 (107)       | 0.71                  | 5.1×10 <sup>-6</sup> |
| PR                                              | 33 vs. 128     | 0.79 (26)        | 0.62 (79)        | 0.70                  | 3.2×10 <sup>-5</sup> |
| HER2                                            | 33 vs. 128     | 0.91 (30)        | 0.16 (21)        | 0.54                  | 4.1×10 <sup>-1</sup> |
| Age of onset (>50 years)                        | 33 vs. 128     | 0.64 (21)        | 0.80 (103)       | 0.72                  | 2.1×10 <sup>-6</sup> |
| <b>BRCA2 vs. Sporadic</b>                       |                |                  |                  |                       |                      |
| ER                                              | 22 vs. 128     | 0.09 (2)         | 0.84 (107)       | 0.46                  | 5.3×10 <sup>-1</sup> |
| PR                                              | 22 vs. 128     | 0.27 (6)         | 0.62 (79)        | 0.44                  | 4.7×10 <sup>-1</sup> |
| HER2                                            | 22 vs. 128     | 0.05 (1)         | 0.84 (107)       | 0.44                  | 2.0×10 <sup>-1</sup> |
| Age of onset (>50 years)                        | 22 vs. 128     | 0.77 (21)        | 0.80 (103)       | 0.79                  | 2.3×10 <sup>-7</sup> |
| <b>Basal-like BRCA1 vs. Basal-like Sporadic</b> |                |                  |                  |                       |                      |
| Age of onset (>50 years)                        | 20 vs. 10      | 0.70 (14)        | 1.00 (10)        | 0.85                  | 3.0×10 <sup>-4</sup> |
| <b>LumB BRCA1 vs. LumB Sporadic</b>             |                |                  |                  |                       |                      |
| Age of onset (>50 years)                        | 9 vs. 48       | 0.33 (3)         | 0.75 (36)        | 0.54                  | 6.9×10 <sup>-1</sup> |
| <b>LumB BRCA2 vs. LumB Sporadic</b>             |                |                  |                  |                       |                      |
| Age of onset (>50 years)                        | 16 vs. 48      | 0.75 (12)        | 0.75 (36)        | 0.75                  | 6.8×10 <sup>-4</sup> |

<sup>a</sup> Mean balanced accuracy

<sup>b</sup> Fisher's exact test

Abbreviations: TP, true positive; TN, true negative
